# Supplementary material for: Features of Profiles of Biologically Active Compounds of Primary and Secondary Metabolism of Lines from VIR Flax Genetic Collection, Contrasting in Size and Color of Seeds
Source: MDPI journal article supplement (doi:10.3390/plants11060750), 2022-03-11
Supplement: s1 [file s1]

Table S3. Comparison of the fatty acid composition in seeds and oil of the VIR genetic collection lines, % of total fatty acids amount.

| Lines of genetic collection | Seedflour |     |      |      |      | Seed oil (Porokhovinova et al., 2017b [47]) |       |      |      |      |
|-----------------------------|-----------|-----|------|------|------|---------------------------------------------|-------|------|------|------|
|                             | pal       | ste | ole  | lio  | lin  | pal                                         | ste   | ole  | lio  | lin  |
| gc -2                       | 9,4       | 3,9 | 33,8 | 23,5 | 29,4 | 4,3                                         | 3,1   | 20,4 | 14,4 | 57,8 |
| gc -65                      | 8,4       | 5,0 | 36,0 | 26,3 | 24,3 | 4,3                                         | 3,9   | 22,3 | 19,8 | 49,6 |
| gc -109                     | 7,9       | 3,6 | 36,8 | 23,1 | 28,7 | 4,9                                         | 3,5   | 29,8 | 15,6 | 46,2 |
| gc -119                     | 9,2       | 4,5 | 31,6 | 23,5 | 31,3 | 5,9                                         | 4,0   | 39,1 | 18,1 | 32,9 |
| gc -124                     | 6,5       | 4,1 | 35,4 | 22,7 | 31,4 | 4,2                                         | 3,0   | 22,2 | 19,2 | 51,4 |
| gc -129                     | 8,1       | 3,5 | 29,6 | 24,6 | 34,2 | 6,2                                         | 3,8   | 19,5 | 16,4 | 54,0 |
| gc -136                     | 8,2       | 4,3 | 28,6 | 21,6 | 37,3 | 5,2                                         | 4,8   | 14,9 | 14,3 | 60,8 |
| gc -141                     | 7,7       | 3,6 | 46,5 | 26,7 | 15,5 | 5,4                                         | 4,3   | 25,4 | 15,5 | 49,4 |
| gc -159                     | 11,6      | 6,3 | 19,0 | 25,0 | 38,1 | 4,0                                         | 3,3   | 23,0 | 17,4 | 52,2 |
| gc 173                      | 9,4       | 5,8 | 27,8 | 25,5 | 31,5 | 5,1                                         | 3,7   | 17,4 | 18,7 | 55,1 |
| gc-391                      | 10,0      | 4,4 | 6,1  | 64,8 | 14,8 | 6,4                                         | 4,9   | 27,4 | 56,6 | 4,6  |
| average                     |           |     |      |      |      |                                             |       |      |      |      |
| Correlations<br>n=11        |           |     |      |      |      | -0,03                                       | -0,13 | 0,02 | 0,99 | 0,62 |
| n=10 (witoutgc-391)         |           |     |      |      |      | -0,24                                       | -0,15 | 0,24 | 0,37 | 0,24 |
