# Supplementary material for: Features of Profiles of Biologically Active Compounds of Primary and Secondary Metabolism of Lines from VIR Flax Genetic Collection, Contrasting in Size and Color of Seeds
Source: MDPI journal article supplement (doi:10.3390/plants11060750), 2022-03-11
Supplement: s1 [file s1]

Table S4. Amino acid composition of flax seed proteins according to the results of metabolomic analysis and standard methods [24, 29]. \* - not detected in the metabolic analysis

|                           | Oomah93 [24],<br>g/100g protein |        |        |         |     |                     | Bhatty90 [29],<br>g/16gN |    |                     | Metabolome<br>mg/g seeds |                     |
|---------------------------|---------------------------------|--------|--------|---------|-----|---------------------|--------------------------|----|---------------------|--------------------------|---------------------|
| Amino acid                | Nor-Lin                         | Foster | Ome-ga | Average | %   | %<br>without<br>“*” | Volume<br>e              | %  | %<br>without<br>“*” | Volume<br>e              | %<br>without<br>“*” |
| Aspartic acid             | 9.3                             | 10     | 9,7    | 9,7     | 11  | <b>13</b>           | 12,5                     | 10 | <b>14</b>           | 21,0                     | <b>18</b>           |
| Threonine                 | 3.6                             | 3,8    | 3,7    | 3,7     | 4   | <b>5</b>            | 4,9                      | 4  | <b>5</b>            | 6,0                      | <b>5</b>            |
| Serine                    | 4.5                             | 4,7    | 4,6    | 4,6     | 5   | <b>6</b>            | 5,8                      | 5  | <b>6</b>            | 2,7                      | <b>2</b>            |
| Glutamic acid             | 19.6                            | 20     | 19,7   | 19,8    | 22  | <b>28</b>           | 26,3                     | 22 | <b>29</b>           | 19,6                     | <b>16</b>           |
| Proline                   | 3.5                             | 3,8    | 3,5    | 3,6     | 4   | <b>5</b>            | 5,2                      | 4  | <b>6</b>            | 20,0                     | <b>17</b>           |
| Glycine                   | 5.8                             | 5,9    | 5,8    | 5,8     | 6   | <b>8</b>            | 7,0                      | 6  | <b>8</b>            | 10,4                     | <b>9</b>            |
| Alanine                   | 4.4                             | 4,7    | 4,5    | 4,5     | 5   | <b>6</b>            | 5,4                      | 5  | <b>6</b>            | 14,2                     | <b>12</b>           |
| Cystine*                  | 1.1                             | 1,8    | 1,1    | 1,3     | 1   |                     | 3,8                      | 3  |                     |                          |                     |
| Valine                    | 4.6                             | 5,1    | 4,7    | 4,8     | 5   | <b>7</b>            | 5,6                      | 5  | <b>6</b>            | 6,9                      | <b>6</b>            |
| Methionine*               | 1.5                             | 1,4    | 1,4    | 1,4     | 2   |                     | 2,2                      | 2  |                     |                          |                     |
| Isoleucine*               | 4                               | 4,1    | 4      | 4,0     | 4   |                     | 5,2                      | 4  |                     |                          |                     |
| Leucine                   | 5.8                             | 6      | 5,9    | 5,9     | 6   | <b>8</b>            | 6,8                      | 6  | <b>8</b>            | 4,7                      | <b>4</b>            |
| Tyrosine                  | 2.3                             | 2,4    | 2,3    | 2,3     | 3   | <b>3</b>            | 2,9                      | 2  | <b>3</b>            | 2,5                      | <b>2</b>            |
| Phenylalanine             | 4.6                             | 4,8    | 4,7    | 4,7     | 5   | <b>7</b>            | 5,3                      | 4  | <b>6</b>            | 9,8                      | <b>8</b>            |
| Histidine                 | 2.2                             | 2,1    | 2,3    | 2,2     | 2   | <b>3</b>            | 2,9                      | 2  | <b>3</b>            | 1,1                      | <b>1</b>            |
| Lysine*                   | 4                               | 4      | 3,9    | 4,0     | 4   |                     | 4,1                      | 3  |                     |                          |                     |
| Arginine*                 | 9.2                             | 10     | 9,4    | 9,5     | 10  |                     | 11,8                     | 10 |                     |                          |                     |
| Tryptophan*               |                                 |        |        |         |     |                     | 1,8                      | 2  |                     |                          |                     |
| Summ                      | 90.0                            | 94,6   | 91,2   | 91,9    | 100 | <b>100</b>          | 119,5                    |    | <b>100</b>          | 119,0                    | <b>100</b>          |
| correlation with Oomah93  |                                 |        |        |         |     | <b>1,00</b>         |                          |    | <b>1,00</b>         |                          | <b>0,62</b>         |
| correlation with Bhatty90 |                                 |        |        |         |     | <b>1,00</b>         |                          |    | <b>1,00</b>         |                          | <b>0,60</b>         |

\* - not detected in the metabolic analysis
